# Supplementary material
Source: Springer Nature journal article supplement (https://www.springermedizin.de/resource/supplementary/12874_2009_424_MOESM4_ESM.pdf/9432064)

$\tau = 1$ 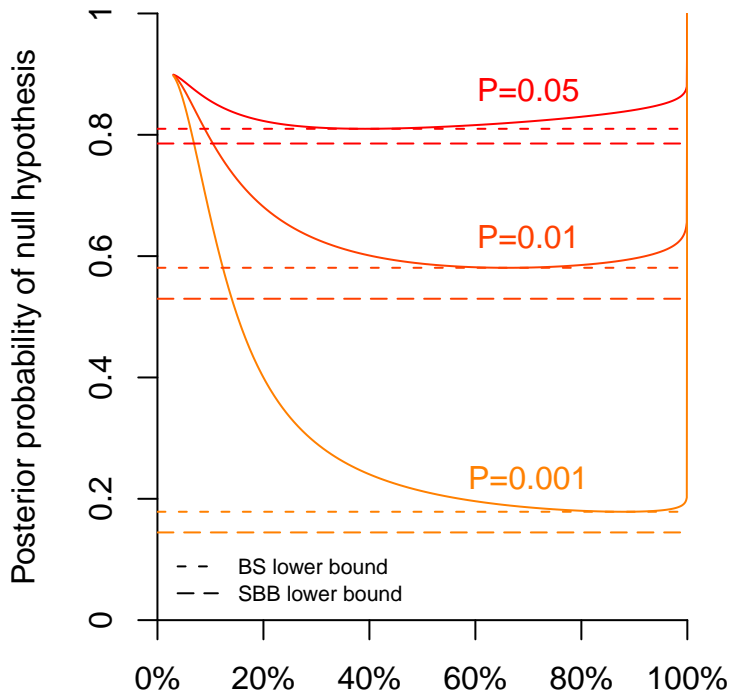

Pre-study power at the 5% significance level

 $\tau = 2$ 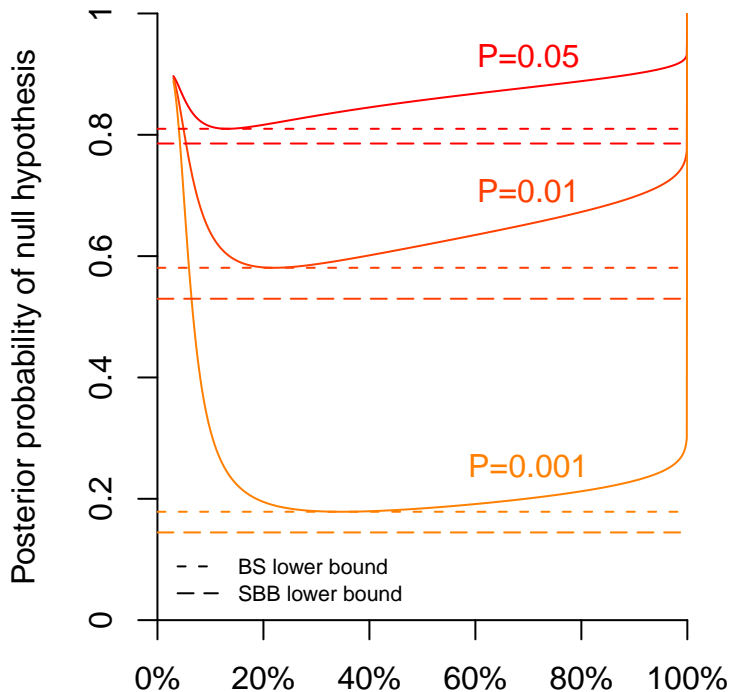

Pre-study power at the 5% significance level

Supplement: MOESM4 [file 9432064]
